# Supplementary material for: Characterization of Refractory Alloys Produced by Laser Additive Manufacturing
Source: Hindawi journal article supplement (doi:10.1155/2022/1928643), 2022-11-24
Supplement: f1 [file 1928643.f1.docx]

**Supplemental**

**Powder Feedstock**

The Mo and Ta powders were obtained in spherical form from Tekna (Quebec, Canada). The Mo powder was purchased with a particle size distribution of -90 + 45 µm, while the Ta was -75 + 38 µm. The Nb powder was acquired from Edgetech Industries, LLC (Miramar, FL, USA) with a size distribution of -75 + 45 µm. The Ti powder was acquired from LPW Technologies, now Carpenter Technologies, (Pennsylvania, USA) with a -90 + 45 µm size distribution.

**Processing Conditions**

To produce these specimens, a range of processing conditions were explored depending upon the alloy composition and geometry, see Table S1 for details.

Table S1 – RCCA processing conditions

| Alloy | Laser power (W) | Perimeter/infill speed (mm/min) |
| --- | --- | --- |
| NbTa | 400-750 | 300/420 |
| MoNbTa | 220-350 | 300/420 |
| NbTaTi | 220-400 | 300/420 |
| MoNbTaTi | 220 | 300/420 |

**Metallographic Preparation**

Metallographic preparation consisted of initial polishing via SiC paper and then with a 1 µm diamond suspension. For electron backscatter diffraction (EBSD) analysis, two vibratory polishing steps were also employed with a 0.3 µm Al2O3 slurry followed by a 0.04 µm SiO2 slurry. Vickers microhardness measurements were taken on a Struers Durascan 70 with a 500 g load. Microstructure analysis was performed on a Zeiss Supra 55-VP Field Emission scanning electron microscope (SEM) equipped with an Oxford Instruments X-Max SDD energy dispersive spectrometer (EDS) and a Symmetry Electron Backscatter Diffraction detector. The SEM working distance was 10 mm and the accelerating voltage was 20 kV for EBSD/general imaging and 30 kV for EDS.

**Mechanical Properties Characterization**

Microscratch tests were used to characterize strain rate dependent hardness of select coupons, using a Revetest Scratch Tester (RST3). A Rockwell C spheroconical indenter was used, with a radius R = 200 µm +/- 10 µm and apex angle = 120° +/- 1°. A constant 10 N normal load, 5 mm wear track length, and constant speed was used for each wear track/measurement. The speed was incrementally changed from one wear track to the next, covering four orders of magnitude of sliding speed (proportional to strain rate) from 10-2 to 101 mm/s, corresponding to four decades of strain rate. The indenter tip was cleaned with a mildly abrasive cloth between scratch experiments to ensure that no residual material was transferred between wear tracks, and the radius of the tip measured before and after the completion of an experiment series to ensure negligible wear of the tip. Each track was spaced at least 1 mm apart to avoid overlap of work-hardening effects from adjacent tracks. Topographical data was captured using a Bruker GT-I optical interferometer with a 10x objective and 1x magnification. The average and standard deviation in wear track width were used to calculate a contact area, and the corresponding average and standard deviation in hardness. The surface analysis omitted data in the first and last 10% (0.5 mm) of wear track, where deformation initiates and ends, to conservatively avoid inertial effects. A detailed overview of this method can be found elsewhere [1]. The strain rate was computed using Eq. 1 [1]:

(1)

where *v* is the scratch velocity and *w* the scratch width. Average hardness (***Hs***) along one wear track was estimated from the testing using Eq. 2:

(2)

where Fn is the normal load and the constant 8/ is for the specimen surface-normal half area of the spheroconical indenter. Wear track widths were in the range 60 to 100 µm such that, for a lateral spatial accuracy of 1 µm for this instrument, the associated error in estimating hardness is negligible compared to the measured variability in wear track width (maximum of 2% error). Thus, reported standard deviations in hardness are expected to primarily be associated with variability in microstructure, not measurement error.

**Grain Size Measurements**

Figure S1 shows the measured average grain size for each alloy as a function of the microstructure area fraction that was occupied by unmelted powder particles. A monotonically decreasing relationship was found between grain size and area fraction of unmelted powder.


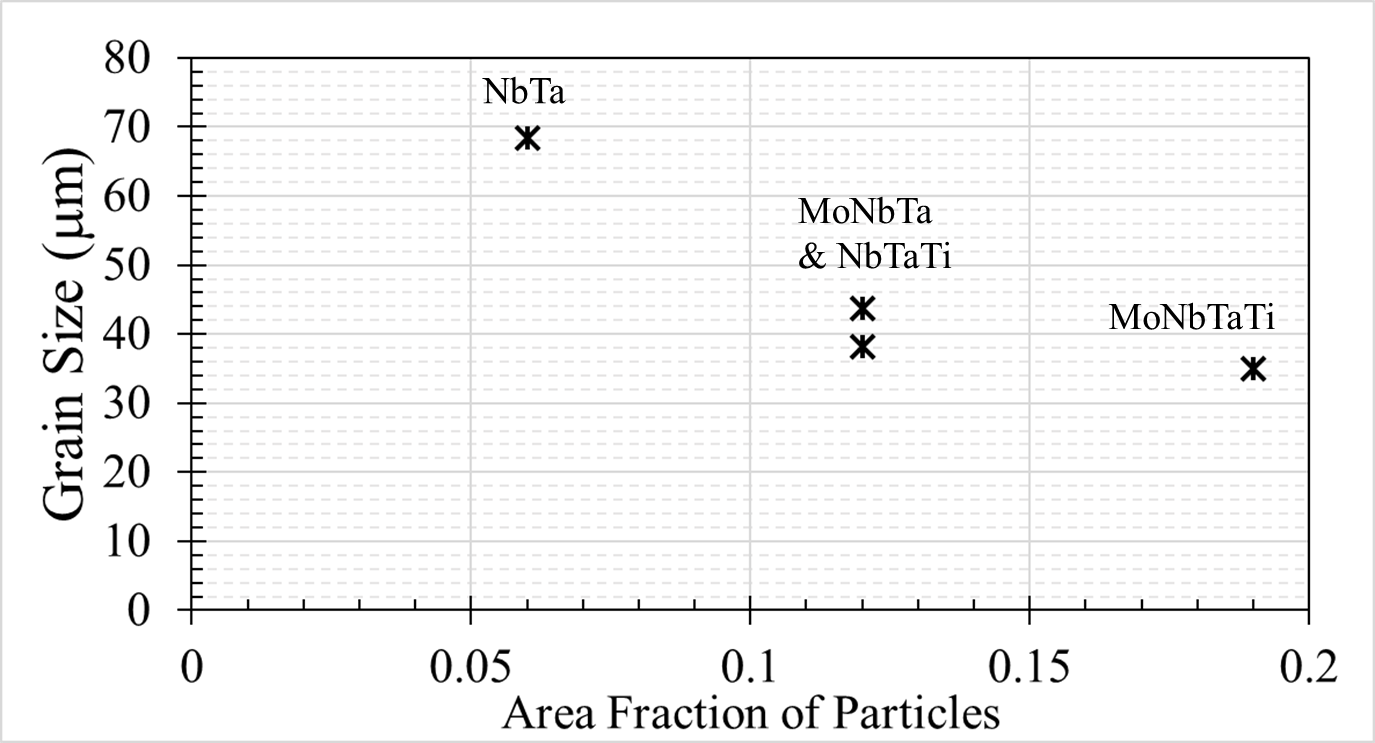


Figure S1 – Measured grain size as a function of area fraction of unmelted powder for the 4 alloys compositions.

**Composition Measurements**

EDS results are tabulated in Table S2. For the near equiatomic binary NbTa alloy monolithic rods, which was processed with a laser power of 400-750 W, only Ta particles were found in the microstructure. Nb appeared to be mostly homogeneous distributed within the specimen. Similarly, the MoNbTa alloy showed a mostly homogeneous distribution of Nb, with the majority of unmelted powder being Ta and Mo. Conversely, the Ti-containing alloys revealed a larger fraction of unmelted powder for all traditional refractory constituents (e.g., Mo, Nb, Ta) and a comparatively homogeneous distribution of Ti. These specimens were also predominately processed at a lower laser power of 220 W so as to avoid excessive vaporization of Ti. The trends in the composition measurements of Table S2 generally agree with the spatial observations, namely that the most homogeneously distributed constituents were also the most abundant in the final consolidated specimens. Indeed, if an insufficient amount of energy is being supplied to melt the fluidized powders, it is conceivable that a larger fraction of the unmelted constituents will not become incorporated within the solidified microstructure and may instead “scatter” off the previously solidified layers. Dobbelstein et al. similarly noted the possibility of having greater incorporation and sticking of powder particles with lower melting temperature for AM processing the MoNbTaW refractory HEA/MPEA [2].

Table S2 – Average RA/RCCA compositions (in at.%).

| MPEA | Mo | Nb | Ta | Ti |
| --- | --- | --- | --- | --- |
| NbTa | -- | 56.5 +/- 3.6 | 43.5 +/- 3.6 | -- |
| MoNbTa | 32.9 +/- 1.2 | 35.9 +/- 1.7 | 31.2 +-/ 1.6 | -- |
| NbTaTi | -- | 28.6 +/- 1.1 | 29.5 +/- 2.2 | 41.8 +/- 2.3 |
| MoNbTaTi | 18.2 +/- 2.7 | 23.1 +/- 1.3 | 23 +/- 3.3 | 35.6 +/- 1.4 |

[1] L.O. Nyakiti, A.F. Jankowski, Characterization of strain-rate sensitivity and grain boundary structure in nanocrystalline gold-copper alloys, Metall. Mater. Trans. A Phys. Metall. Mater. Sci. 41 (2010) 838–847. https://doi.org/10.1007/s11661-009-9996-9.

[2] H. Dobbelstein, M. Thiele, E.L. Gurevich, E.P. George, A. Ostendorf, Direct metal deposition of refractory high entropy alloy MoNbTaW, Phys. Procedia. 83 (2016) 624–633. https://doi.org/10.1016/j.phpro.2016.08.065.
